# Supplementary material
Source: PubMed Central journal article supplement (PMC7674211)
Supplement: NIHMS1628614-supplement-Supplemental_Material.pdf [file NIHMS1628614-supplement-Supplemental_Material.pdf]

## SUPPLEMENTAL MATERIAL

## Supplemental Figures and Figure Legends

### Online Figure I.

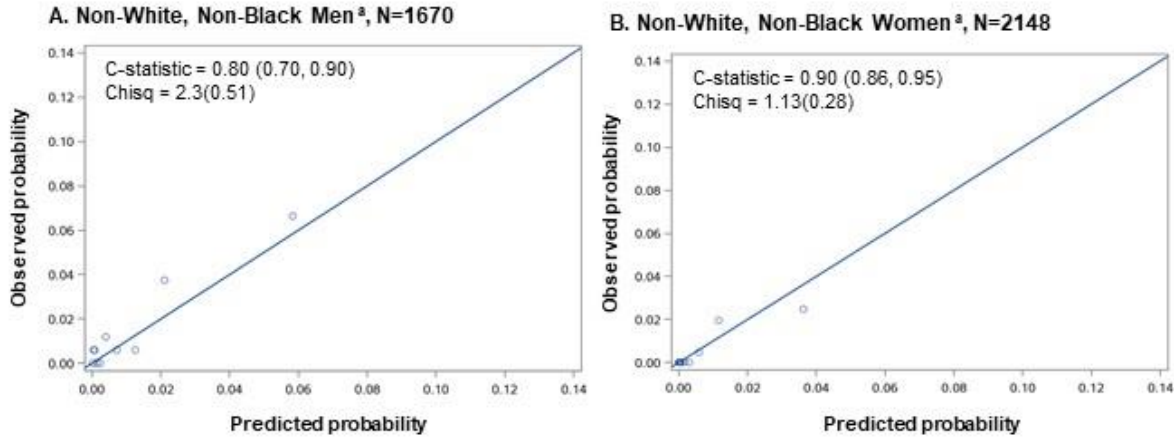

**Online Figure I.** Calibration and discrimination statistics of Modified Pooled Cohort equations to Prevent Heart Failure (PCP-HF) model when applied to contemporary electronic health record population in A) Non-White, Non-Black Men, B) Non-White, Non-Black Women. In each race-sex group, patients were categorized into deciles based on predicted probability of incident heart failure. Deciles were collapsed as needed if <2 heart failure events occurred. Harrell's C-statistics for discrimination and Greenwood-Nam D'Agostino chi square statistic for calibration were used. CI= confidence interval.

<sup>a</sup> Self report of race as non-white, non-Black or did not report race

## Online Figure II.

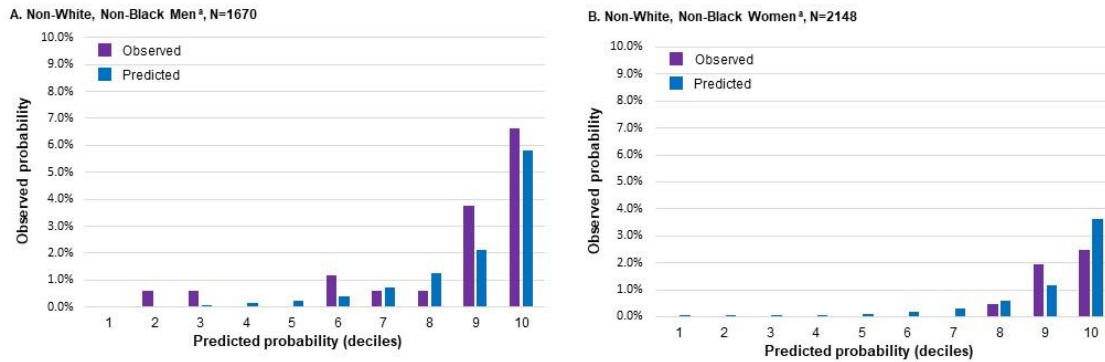

**Online Figure II.** Predicted vs observed probability of incident diagnosis of HF in contemporary electronic health record population in A) Non-White, Non-Black Men B) Non-White, Non-Black Women. Predicted probability estimated using Modified Pooled Cohort Equation to Prevent Heart Failure (PCP-HF) model. In each race-sex group, patients were categorized into deciles based on predicted probability of incident heart failure. Observed probability defined by established criteria using Internal Classification of Disease codes.

<sup>a</sup> Self report of race as non-white, non-Black or did not report race

### Online Figure III.

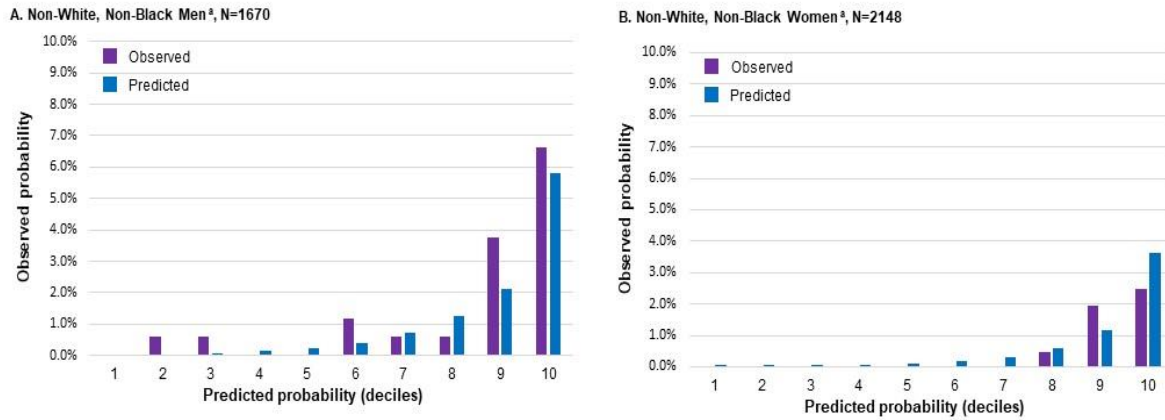

**Online Figure III :** Calibration and discrimination statistics of the Modified Pooled Cohort Equations to Prevent Heart Failure (PCP-HF) model when applied to contemporary electronic health record population with available data on QRS duration in A) White Men, B) White Women, C) Black Men and D) Black Women. In each race-sex group, patients were categorized into deciles based on predicted probability of incident heart failure. Deciles were collapsed as needed if <2 heart failure events occurred. Harrell’s C-statistics for discrimination and Greenwood-Nam D’Agostino chi square statistic for calibration were used. CI= confidence interval.

## Supplemental Tables

**Online Table I. Baseline Characteristics of the Electronic Health Record-Based Primary Prevention Cohort Stratified by Electrocardiogram Availability**

|                                                 | <b>QRS Value<br/>N=5,749</b> | <b>No QRS Value<br/>N=25,507</b> | <b>P-Value</b> |
|-------------------------------------------------|------------------------------|----------------------------------|----------------|
| <b>Mean age, years (SD)</b>                     | 54 (11.7)                    | 51 (11.2)                        | <.0001         |
| <b>Female sex, n (%)</b>                        | 3448 (60.0)                  | 14530 (56.8)                     | <.0001         |
| <b>Black race, n (%)</b>                        | 1393 (24.2)                  | 1892 (7.4)                       | <.0001         |
| <b>Diabetes, n (%)</b>                          | 952 (16.6)                   | 2735 (10.7)                      | <.0001         |
| <b>Casual glucose, mg/dL (SD)</b>               | 104.3 (35.3)                 | 99.5 (26.8)                      | <.0001         |
| <b>Diabetes treatment, n (%)</b>                | 965 (16.8)                   | 2050 (8.0)                       | <.0001         |
| <b>Current smoking, n (%)</b>                   | 518 (9.0)                    | 2632 (10.3)                      | 0.0037         |
| <b>Mean systolic blood pressure, mm Hg (SD)</b> | 127.1 (17.6)                 | 125.5 (16.5)                     | <.0001         |
| <b>Hypertension, n (%)</b>                      | 3159 (54.9)                  | 10657 (41.6)                     | <.0001         |
| <b>Hypertension treatment, n (%)</b>            | 3022 (52.6)                  | 9185 (35.9)                      | <.0001         |
| <b>Mean total cholesterol, mg/dL (SD)</b>       | 189.2 (38.6)                 | 194.6 (36.2)                     | <.0001         |
| <b>Mean HDL cholesterol, mg/dL (SD)</b>         | 50.9 (15.7)                  | 52 (15.1)                        | <.0001         |
| <b>Mean BMI, kg/m<sup>2</sup></b>               | 28.9 (6.3)                   | 28.8 (6.0)                       | 0.8984         |
| <b>Mean QRS duration, msec (SD)<sup>2</sup></b> | 88.2 (12.9)                  | NA                               | NA             |

\*Abbreviations: BMI, Body Mass Index; HDL, High Density Lipoprotein

**Online Table II. Race- and Sex-Specific Equation Parameters for Estimation of 10 Year Risk of HF Derived from the Lifetime Risk Pooling Project for the Modified Pooled Cohort Equations to Prevent Heart Failure (PCP-HF) without QRS duration**

|                                                 | <b>White Male</b> | <b>White Female</b> | <b>Black Male</b> | <b>Black Female</b> |
|-------------------------------------------------|-------------------|---------------------|-------------------|---------------------|
| <b>Ln Age (y)</b>                               | 42.50             | 18.15               | 2.99              | 50.32               |
| <b>Ln Age, Squared</b>                          | -0.97             | N/A                 | N/A               | N/A                 |
| <b>Ln Treated Systolic BP (mm Hg)</b>           | 0.97              | 10.85               | 2.40              | 29.0                |
| <b>Ln Age×Ln Treated Systolic BP</b>            | N/A               | -2.47               | N/A               | -6.57               |
| <b>Ln Untreated Systolic BP (mm Hg)</b>         | 0.85              | 9.71                | 2.26              | 28.09               |
| <b>Ln Age×Ln Untreated Systolic BP</b>          | N/A               | -2.21               | N/A               | -6.37               |
| <b>Current Smoker (1=Yes, 0=No)</b>             | 0.73              | 10.95               | 1.49              | 0.75                |
| <b>Ln Age×Current Smoker</b>                    | N/A               | -2.50               | -0.21             | N/A                 |
| <b>Ln Treated glucose (mg/dL)</b>               | 0.92              | 1.03                | 0.63              | 0.99                |
| <b>Ln Untreated glucose (mg/dL)</b>             | 0.80              | 0.90                | 0.55              | 0.83                |
| <b>Ln Total Cholesterol (mg/dL)</b>             | 0.46              | N/A                 | N/A               | 0.26                |
| <b>Ln HDL-C (mg/dL)</b>                         | -0.42             | -0.07               | -0.80             | N/A                 |
| <b>Ln BMI (Kg/m<sup>2</sup>)</b>                | 37.0              | 1.37                | 1.21              | 19.75               |
| <b>Ln Age× Ln BMI</b>                           | -8.77             | N/A                 | N/A               | -4.60               |
| <b>Ln QRS duration (msec)</b>                   | N/A               | N/A                 | N/A               | N/A                 |
| <b>Mean Coefficient× Value (<i>MeanCV</i>)</b>  | 169.25            | 85.03               | 26.30             | 223.05              |
| <b>Baseline Survival (<i>S<sub>0</sub></i>)</b> | 0.98743           | 0.99331             | 0.98297           | 0.99241             |

\*Abbreviations: BMI, Body Mass Index; BP, Blood Pressure; HDL, High Density Lipoprotein

**Online Table III. Model Discrimination of the Modified Pooled Cohort Equations to Prevent Heart Failure (PCP-HF) without QRS in the Lifetime Risk Pooling Project (Internal Validation)**

|                    | <b>Modified PCP-HF Model<br/>(C statistics (95% CI))</b> |
|--------------------|----------------------------------------------------------|
| <b>White Men</b>   | 0.82<br>(0.79, 0.85)                                     |
| <b>White Women</b> | 0.83<br>(0.80, 0.87)                                     |
| <b>Black Men</b>   | 0.82<br>(0.77, 0.88)                                     |
| <b>Black Women</b> | 0.78<br>(0.71, 0.85)                                     |

\*Abbreviations: CI, Confidence Interval

**Online Table IV. Diagnosis and Associated International Classification of Disease Codes**

| Diagnosis                                            | ICD 9/10 Code                                                                                       |
|------------------------------------------------------|-----------------------------------------------------------------------------------------------------|
| <b>Stroke/Cerebrovascular Disease</b>                | ICD 9: 430-432.9; 433.x; 434.x<br>ICD 10: I60-62; I63.x; I65.x; I66.x                               |
| <b>Coronary Artery Disease(including MI and ACS)</b> | ICD 9: 410.x; 411.x; 412; 413.x; 414.x<br>ICD 10: I20.xx; I21.x; I22.x; I23.x; I24.8; I24.9; I25.x; |
| <b>Peripheral Arterial Disease</b>                   | ICD 9: 440.2x; 440.3x; 443.9x<br>ICD 10: I70.2x; 170.3x; 170.4x; 170.5x; 170.6x; 170.7x; I73.9x     |
| <b>Heart Failure</b>                                 | ICD 9: 402.x1; 404.x1; 404.x3; 428.x<br>ICD 10: I09.81; I11.0; I13.0; I50.x                         |
| <b>Pacemaker</b>                                     | ICD 9: V45.x<br>ICD-10: Z95.x                                                                       |
| <b>Diabetes</b>                                      | ICD 9: 250<br>ICD10: E11                                                                            |
| <b>Hypertension</b>                                  | ICD9: 401-405<br>ICD10: I10-I15                                                                     |

\*Abbreviations: ACS, Acute Coronary Syndrome; ICD 9/10, Internal Classification of Diagnosis Ninth or Tenth Revision; MI, Myocardial Infarction



**Online Table V. Baseline Patient Characteristics of the Electronic Health Record-Based Primary Prevention Cohort not self-identified as White or Black**

|                                                 | <b>Non-White, Non-Black Race †</b> |                |
|-------------------------------------------------|------------------------------------|----------------|
|                                                 | <b>Men</b>                         | <b>Women</b>   |
|                                                 | <b>N= 1670</b>                     | <b>N= 2148</b> |
| <b>Mean age, years (SD)</b>                     | 48.0 (11.3)                        | 48.5 (11.6)    |
| <b>Current smoking, n (%)</b>                   | 194 (12)                           | 157 (7)        |
| <b>Diabetes, n (%)</b>                          | 221 (13)                           | 226 (11)       |
| <b>Casual glucose, mg/dL (SD)</b>               | 105 (33)                           | 98 (28)        |
| <b>Mean systolic blood pressure, mm Hg (SD)</b> | 126 (15)                           | 121 (17)       |
| <b>Hypertension treatment, n (%)</b>            | 725 (43)                           | 904 (42)       |
| <b>Mean BMI, kg/m<sup>2</sup></b>               | 28.2 (5.0)                         | 27.2 (6.3)     |
| <b>Mean total cholesterol, mg/dL (SD)</b>       | 191 (38)                           | 192 (36)       |
| <b>Mean HDL cholesterol, mg/dL (SD)</b>         | 44 (12)                            | 55 (15)        |

\*Abbreviations: BMI, Body Mass Index; HDL, High Density Lipoprotein

†Self report of race as non-white, non-Black, or did not disclose race

**Online Table VI. Discrimination and Calibration Statistics of the Modified Pooled Cohort Equations to Prevent Heart Failure in Electronic Health Record-Based Cohort Patients not self-identified as White or Black**

|                                      | Non-White, Non-Black Race <sup>†</sup> |                      |
|--------------------------------------|----------------------------------------|----------------------|
|                                      | Men                                    | Women                |
| <b>Total N</b>                       | 1670                                   | 2148                 |
| <b>Events</b>                        | 30                                     | 27                   |
| <b>Events per 1000 patient years</b> | 3.6                                    | 2.5                  |
| <b>C statistics (95% CI)</b>         | 0.80<br>(0.70, 0.90)                   | 0.90<br>(0.86, 0.95) |
| <b>GND Chi-square, P value</b>       | 2.3<br>(0.51)                          | 1.13<br>(0.28)       |

\*Abbreviations: CI, Confidence Interval; GND, Greenwood Nam D'Agostino

<sup>†</sup>Self report of race as non-white, non-black, or did not disclose race
